# Supplementary material for: High-temperature, high-pressure hydrothermal synthesis, crystal structure, and infrared and NMR spectroscopy of a barium lead borate with a 2D layer structure: [Ba3Pb(H2O)][B11O19(OH)3]
Source: Royal Society of Chemistry journal article supplement (doi:10.1039/d0dt01172j), 2020-01-01
Supplement: d0dt01172j1.pdf [file d0dt01172j1.pdf]

## Supporting Information

**High-Temperature, High-Pressure Hydrothermal Synthesis, Crystal Structure,  
Infrared and NMR Spectroscopy of a Barium Lead Borate with 2D Layer  
Structure: [Ba<sub>3</sub>Pb(H<sub>2</sub>O)][B<sub>11</sub>O<sub>19</sub>(OH)<sub>3</sub>]**

Yu-Chen Kuo<sup>a</sup>, Hsin-Kuan Liu,<sup>a</sup> Sue-Lein Wang,<sup>\*,b</sup> and Kwang-Hwa Lii<sup>\*,a,c</sup>

<sup>a</sup>Department of Chemistry, National Central University, Zhongli, Taiwan 320, R.O.C.

<sup>b</sup>Department of Chemistry, National Tsing Hua University, Hsinchu, Taiwan 300, R.O.C.

<sup>c</sup>Institute of Chemistry, Academia Sinica, Taipei, Taiwan 115, R.O.C.

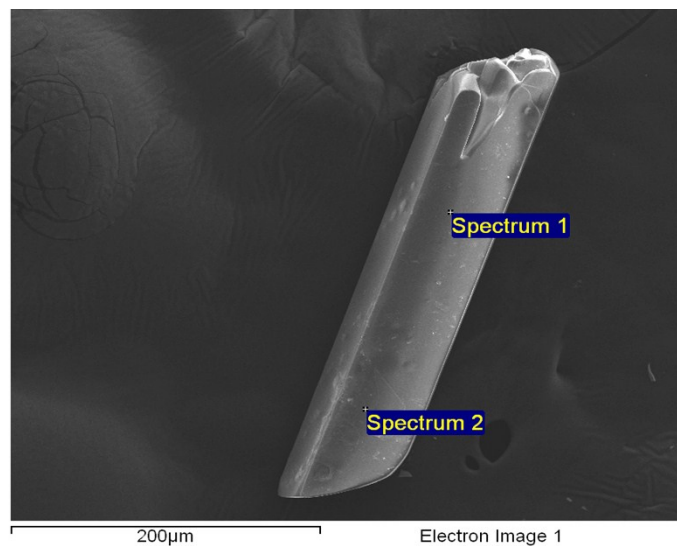

Processing option: Oxygen by stoichiometry (Normalised)  
LB-01

| Spectrum       | In stats. | B     | Ba    | Pb   | O     |
|----------------|-----------|-------|-------|------|-------|
| Spectrum1      | Yes       | 30.36 | 9.24  | 2.80 | 57.59 |
| Spectrum2      | Yes       | 22.59 | 13.56 | 8.21 | 55.65 |
| Mean           |           | 26.47 | 11.40 | 5.51 | 56.62 |
| Std. deviation |           | 5.50  | 3.05  | 3.82 | 1.37  |
| Mas.           |           | 30.36 | 13.56 | 8.21 | 57.59 |
| Min            |           | 22.59 | 9.24  | 2.80 | 55.65 |

All results in atomic %

**Figure S1.** Results of EDS analysis on a crystal of  $[\text{Ba}_3\text{Pb}(\text{H}_2\text{O})][\text{B}_{11}\text{O}_{19}(\text{OH})_3]$ .

|                        | Value |                           | Use                                 | Value      | Code   | Error      |
|------------------------|-------|---------------------------|-------------------------------------|------------|--------|------------|
| GOF                    | 2.05  | Use Phase                 | <input checked="" type="checkbox"/> |            |        |            |
| Resp                   | 3.29  | Le Bail                   | <input type="checkbox"/>            |            |        |            |
| Rwp                    | 6.77  | Delete hkls on Refinement | <input checked="" type="checkbox"/> |            |        |            |
| Rp                     | 4.59  | LP Search                 | <input type="checkbox"/>            | 0.4        |        |            |
| Rexp-dash              | 5.44  | Spacegroup                |                                     | P21/n      |        |            |
| Rwp-dash               | 11.18 | a (Å)                     |                                     | 6.6763254  | Refine | 0.0004093  |
| Rp-dash                | 8.52  | b (Å)                     |                                     | 30.4410438 | Refine | 0.0014908  |
| Weighted Durbin Watson | 0.78  | c (Å)                     |                                     | 8.7765892  | Refine | 0.0004553  |
|                        |       | beta                      |                                     | 90.91868   | Refine | 0.00353863 |

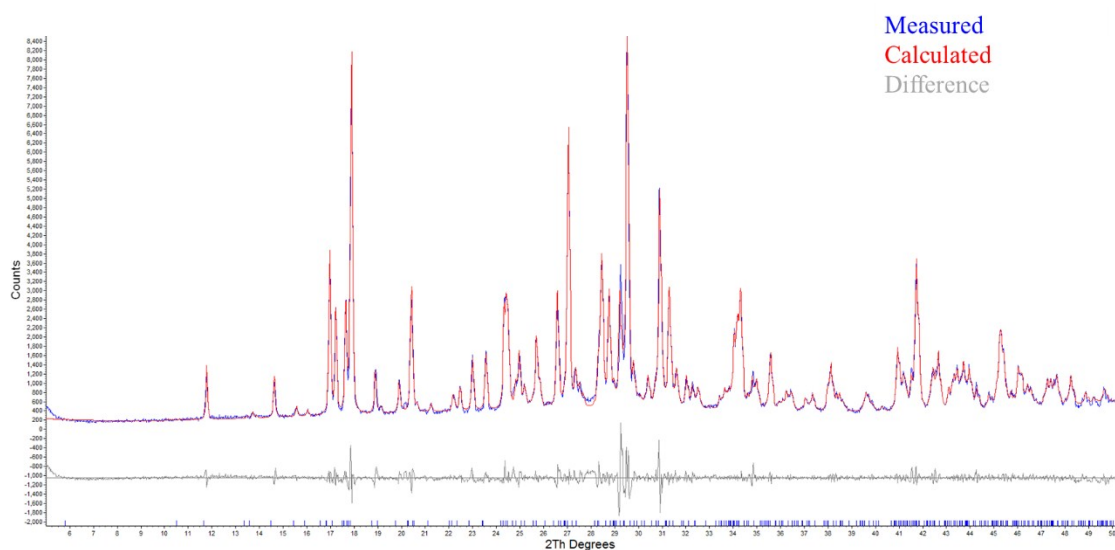

**Figure S2.** Pawley fit of the powder diffraction data to the structure of  $[\text{Ba}_3\text{Pb}(\text{H}_2\text{O})][\text{B}_{11}\text{O}_{19}(\text{OH})_3]$ .
